# Supplementary material for: Can the performance of graphene nanosheets for lithium storage in Li-ion batteries be predicted?
Source: Royal Society of Chemistry journal article supplement (doi:10.1039/c2nr11936f), 2012-01-01
Supplement: c2nr11936f.pdf [file c2nr11936f.pdf]

## Electronic Supplementary Information

### Table of Contents

Figure 1S. FWHM vs.  $L_a$  plot.

Figure 2S. HRTEM of GNS  $N_2H_4$  (a), GNS  $KBH_4$  (b), GNS 500 (c) and GNS 800 (d). Bar is 8nm for (a) and (b), and 6nm for (c) and (d).

Figure 3S. SAD of GNS  $N_2H_4$  (a), GNS  $KBH_4$  (b), GNS 300 (c) and EDAX of GNS  $KBH_4$  (d).

Figure 4S. TG curves of GO and GNS. Heating rate  $5\text{ }^\circ\text{C min}^{-1}$  under air (unless otherwise stated).

Table 1S. Elemental analysis of the graphenes.

Table 2S. Specific capacity ( $\text{mAh g}^{-1}$ ) delivered by the half-cells after different number of cycles.

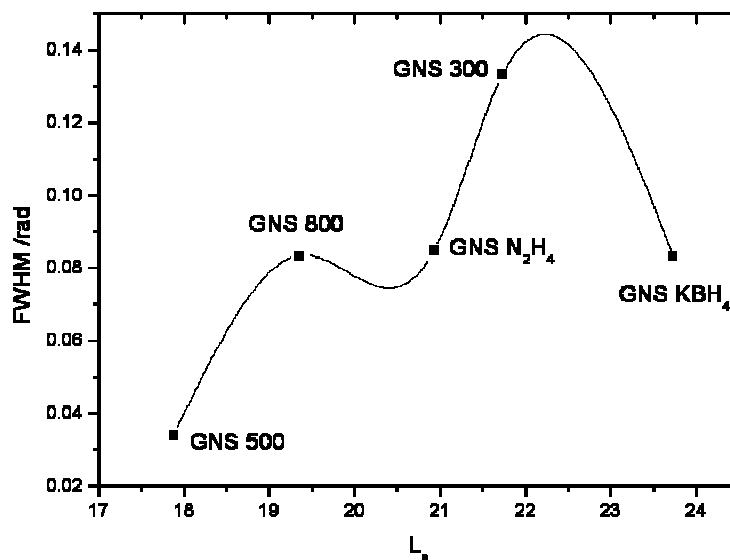

Figure 1S. FWHM vs.  $L_a$  plot.

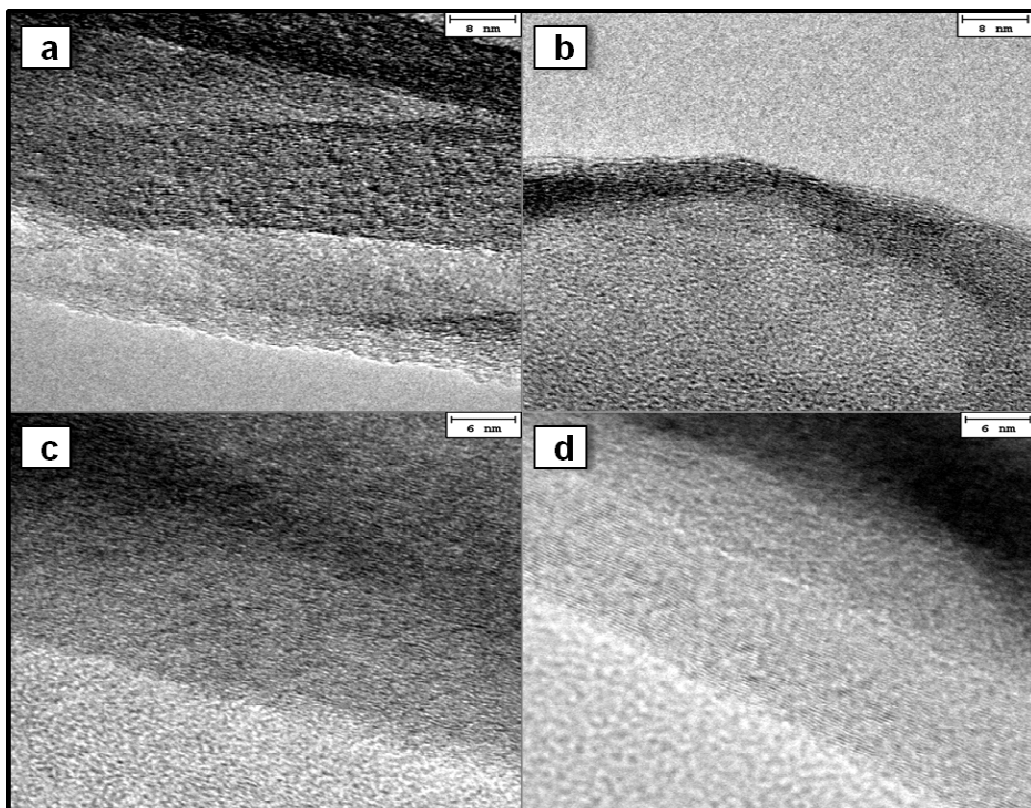

**Figure 2S.** HRTEM of GNS  $N_2H_4$  (a), GNS  $KBH_4$  (b), GNS 500 (c) and GNS 800 (d). Bar is 8nm for (a) and (b), and 6nm for (c) and (d).

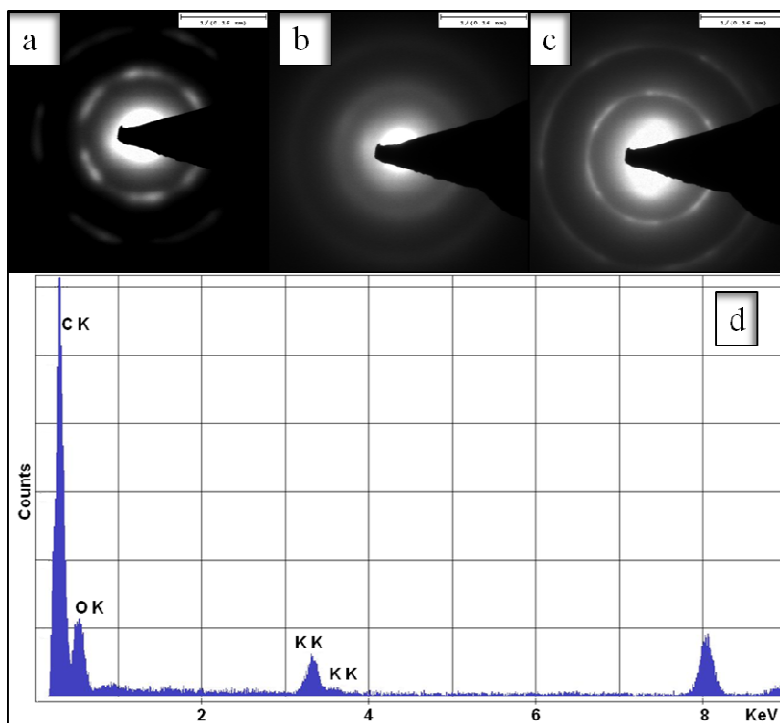

**Figure 3S.** SAD of GNS  $N_2H_4$  (a), GNS  $KBH_4$  (b), GNS 300 (c) and EDAX of GNS  $KBH_4$  (d).

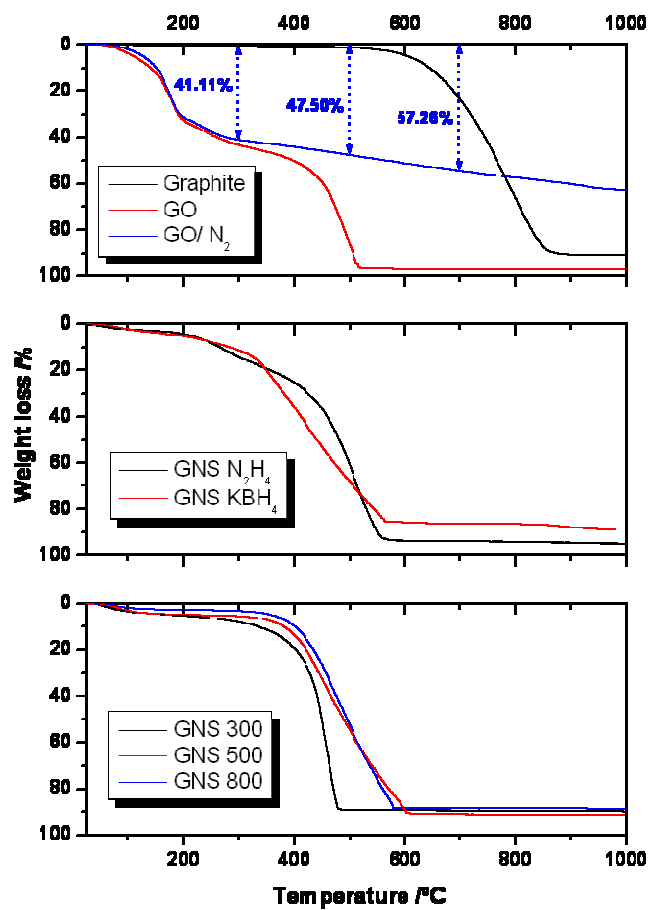

Figure 4S. TG curves of GO and GNS. Heating rate  $5\text{ }^{\circ}\text{C min}^{-1}$  under air (unless otherwise stated).

Table 1S. Elemental analysis of the graphenes.

| Sample                     | C<br>(% ms) | H<br>(% ms) | N<br>(% ms) | S<br>(% ms) | O<br>(% ms) | C/O<br>(EA) | C/O<br>(XPS) |
|----------------------------|-------------|-------------|-------------|-------------|-------------|-------------|--------------|
| GO                         | 45.67       | 2.44        | 0.04        | 1.68        | 42.38       | 1.08        | 3.37         |
| GNS $\text{N}_2\text{H}_4$ | 71.08       | 1.16        | 5.82        | 0.01        | 13.34       | 5.33        | 5.63         |
| GNS $\text{KBH}_4$         | 66.47       | 1.41        | 0.12        | 0.00        | 21.62       | 3.07        | 6.95         |
| GNS 300                    | 69.51       | 0.66        | 0.22        | 0.30        | 22.63       | 3.07        | 5.92         |
| GNS 500                    | 76.53       | 0.67        | 0.30        | 0.00        | 15.48       | 4.94        | 6.46         |
| GNS 800                    | 81.93       | 0.80        | 0.12        | 0.00        | 8.27        | 9.91        | 6.88         |

**Table 2S.** Specific capacity (mAh g<sup>-1</sup>) delivered by the half-cells after different number of cycles.

| Sample                            | Rate | Cycle number |     |     |     |     |
|-----------------------------------|------|--------------|-----|-----|-----|-----|
|                                   |      | 2            | 10  | 20  | 50  | 100 |
| GNS N <sub>2</sub> H <sub>4</sub> | 1C   | 734          | 536 | 491 | 397 | 374 |
|                                   | C/5  | 1292         | 907 | 832 | 655 | 688 |
| GNS KBH <sub>4</sub>              | 1C   | 410          | 286 | 214 | 208 | 202 |
|                                   | C/5  | 552          | 343 | 284 | 260 | 251 |
| GNS 300                           | 1C   | 759          | 612 | 520 | 368 | 300 |
|                                   | C/5  | 941          | 762 | 673 | 506 | 488 |
| GNS 500                           | 1C   | 681          | 537 | 486 | 368 | 277 |
|                                   | C/5  | 750          | 644 | 524 | 381 | 354 |
| GNS 800                           | 1C   | 308          | 267 | 234 | 218 | 229 |
|                                   | C/5  | 411          | 341 | 308 | 270 | 279 |
